# Supplementary material
Source: ML conference proceedings conference paper supplement (https://openaccess.thecvf.com/content/CVPR2026/html/Zhang_RoMo_A_Large-Scale_CVPR_2026_paper.html)
Supplement: Supplementary file 1 [file Zhang_RoMo_A_Large-Scale_CVPR_2026_supplemental.pdf]

# RoMo: A Large-Scale, Richly Organized Dataset and Semantic Taxonomy for Human Motion Generation

## Supplementary Material

Jiahao Zhang<sup>1,2</sup> Joseph Liu<sup>2</sup> Young-Yoon Lee<sup>2</sup> Seonghyeon Moon<sup>2</sup>  
Victor Zordan<sup>2</sup> Guy Tevet<sup>3</sup> C. Karen Liu<sup>3</sup> Stephen Gould<sup>1</sup>  
Oren Jacob<sup>2</sup> Haomiao Jiang<sup>2</sup> Mubbasis Kapadia<sup>2,4</sup> Yizhak Ben-Shabat<sup>2</sup>  
<sup>1</sup>Australian National University <sup>2</sup>Roblox <sup>3</sup>Stanford University <sup>4</sup>Rutgers University

<sup>1</sup>{jiaho.zhang, stephen.gould}@anu.edu.au

<sup>2</sup>{josephliu, ylee, smoon, vbzordan, haomiaojiang, ojacob, mkapadia, ibenshabat}@roblox.com

<sup>3</sup>{guytevet, karenliu}@cs.stanford.edu

<https://davidzhang73.github.io/romo-website>

### Abstract

*This supplementary material provides extensive quantitative and interactive support for the claims presented in our main paper. We strongly encourage readers to engage with the accompanying interactive website and video, which offer a full demo of the **Motion Toolbox**, a Mindmap visualization of the novel semantic taxonomy, 3D rendered visualizations of motion samples from each category, and detailed analysis plots of our adaptive filtering approach. This document extends the model evaluation to include **MoMask++** and **MDM+BERT**, leveraging the taxonomy for a fine-grained, category-based analysis that reveals architecture-specific trade-offs. Furthermore, we present an ablation study quantifying the optimal trade-off in motion dynamics using our Dynamic Score ( $S_{Dynamic}$ ), demonstrating that a refined subset ( $V_C$ ) significantly improves generative performance (FID of 17.97 vs. 20.63 for the full set). Finally, we provide full implementation details for reproducibility and demonstrate the power of our hierarchical taxonomy with the **Context-Aware Adaptive Filtering methodology**, which strategically preserves authentic, category-specific motions while eliminating quality artifacts.*

### 1. Taxonomy-Based Fine-Grained Evaluation

Building upon the comparison of diffusion-based and GPT architectures in the main paper (Sec. 6), we extend our evaluation to include **MoMask++** [1] and **MDM+BERT** [2]. We report the performance of these models in Tab. 1 and Tab. 2 for semantic and physical metrics, respectively. Leveraging RoMo’s broad taxonomy allows for a fine-

grained analysis that surfaces intriguing trade-offs between these architectures. For example, while MDM demonstrates strong physical fidelity, MoMask++ achieves higher performance on semantic metrics, particularly FID (Fréchet Inception Distance), suggesting it better captures the statistical properties of the true motion distribution.

#### 1.1. Taxonomy-Based Evaluation Insights

Our hierarchical taxonomy exposes a non-uniform model performance across motion categories, validating the need to move beyond aggregated metrics. For instance, MoMask++ significantly outperforms MDM in FID within categories characterized by subtle motions like *Communication*, *Education*, and *Gestures* (Tab. 3). To validate these variances, we evaluated 1,000 motion samples **randomly selected** per category across the top 10 most frequent categories. These results collectively suggest that diffusion-based approaches (MDM) offer better adherence to physical constraints, while transformer-based approaches (MoMask++) excel at capturing the distributional nuances of complex social and expressive motions.

#### 1.2. Addressing Physical Quality Discrepancies

The performance disparities on physical metrics are pronounced (Tab. 4). MoMask++ shows significantly higher values for Jerk (e.g., 332.73 overall vs. 46.77 for MDM) and Acceleration Peaks, indicating less smooth and more artifact-prone sequences. This is typical for discrete tokenization approaches, where the quantization and sequential generation process can lead to accumulated temporal inconsistencies. Conversely, MDM’s holistic, non-autoregressive denoising mechanism appears to enforce superior long-

### Dynamic Score Comparison MotionMillion vs Ours

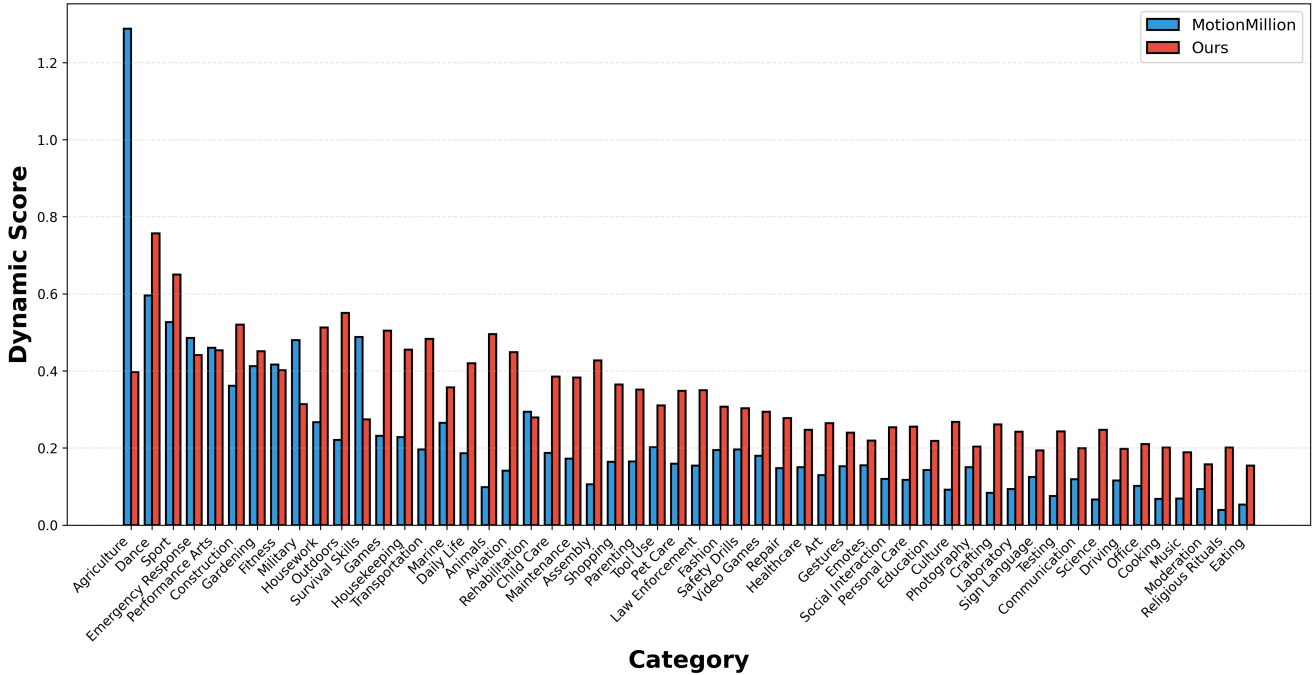

Figure 1. **Dynamic Score analysis.** RoMo demonstrates higher dynamic scores across the majority of categories

Table 1. **Semantic benchmark.** Comparison of text-to-motion generation quality between MoMask++ and MDM trained on the RoMo full dataset.

| Method   | R Precision |        |        | Diversity ↑ | FID ↓ | Matching Score ↑ |
|----------|-------------|--------|--------|-------------|-------|------------------|
|          | Top1        | Top2   | Top3   |             |       |                  |
| MDM+BERT | 0.5822      | 0.7578 | 0.8434 | 27.59       | 17.97 | 12.18            |
| MoMask++ | 0.5148      | 0.6910 | 0.7820 | 28.17       | 14.30 | 12.86            |

range consistency and physical plausibility, leading to substantially smoother motion.

## 2. Category-Wise Validation of Superior Motion Dynamics

Building on the global analysis provided in the main paper, we present a comprehensive per-category comparison of Dynamic Scores between our RoMo dataset and MotionMillion in Figure 1. This fine-grained breakdown substantiates our primary finding: RoMo consistently exhibits **higher motion intensity** across the vast majority of categories.

While MotionMillion may achieve higher Dynamic Scores in a few isolated categories, our dataset demonstrates a clear systematic advantage, validating that the substantial global increase in mean Dynamic Score (0.336 for RoMo vs. 0.222 for MotionMillion) is driven not by outliers, but

by a systematic improvement in motion quality across the taxonomy. This per-category perspective is essential, as it confirms that RoMo provides a more reliable and vigorous training signal across the entire spectrum of human activities.

## 3. Optimizing Training Signal via Dynamic Score Ablation

To quantify the impact of motion quality on generative performance, we conduct an ablation study across five mutually exclusive data partitions defined by our dynamic score ( $S_{Dynamic}$ ). Starting from the complete dataset (All), we define four distinct subsets ( $V_A, V_B, V_C, V_D$ ) based on their dynamic range, testing MDM performance on each.

Table 2. **Physical benchmark.** Comparison of physical motion artifacts and dynamic characteristics between MoMask++ and MDM.

| Method   | Foot Skating ↓ | Jerk ↓ | Ground Penetration ↓ | Floating ↑ | Acceleration Peaks ↑ | Dynamic Score ↑ |
|----------|----------------|--------|----------------------|------------|----------------------|-----------------|
| MDM+BERT | 0.0011         | 46.77  | 0.00                 | 0.0146     | 0.8374               | 0.2132          |
| MoMask++ | 0.0022         | 332.73 | 2.1e−05              | 0.0020     | 4.7223               | 0.3887          |

Table 3. **Taxonomy-based semantic evaluation.** Fine-grained breakdown of generation quality comparing MDM and MoMask++ across the top 10 categories.

| Category      | Method   | R Precision |        |        | Diversity ↑ | FID ↓ | Matching Score ↑ |
|---------------|----------|-------------|--------|--------|-------------|-------|------------------|
|               |          | Top1        | Top2   | Top3   |             |       |                  |
| Overall       | MDM      | 0.5822      | 0.7578 | 0.8434 | 27.59       | 17.97 | 12.18            |
|               | MoMask++ | 0.5148      | 0.6910 | 0.7820 | 28.17       | 14.30 | 12.86            |
| Communication | MDM      | 0.3771      | 0.5363 | 0.6393 | 21.60       | 28.97 | 9.77             |
|               | MoMask++ | 0.3152      | 0.4635 | 0.5621 | 23.13       | 14.64 | 11.08            |
| Daily Life    | MDM      | 0.4782      | 0.6567 | 0.7537 | 26.55       | 27.80 | 12.15            |
|               | MoMask++ | 0.4066      | 0.5783 | 0.6760 | 26.56       | 21.27 | 12.91            |
| Dance         | MDM      | 0.3514      | 0.5111 | 0.6105 | 22.88       | 32.02 | 12.56            |
|               | MoMask++ | 0.3088      | 0.4459 | 0.5344 | 21.48       | 37.09 | 12.67            |
| Education     | MDM      | 0.3477      | 0.5221 | 0.6349 | 22.06       | 31.56 | 11.02            |
|               | MoMask++ | 0.3080      | 0.4641 | 0.5791 | 23.82       | 17.59 | 12.07            |
| Fitness       | MDM      | 0.5777      | 0.7525 | 0.8350 | 27.35       | 23.78 | 13.01            |
|               | MoMask++ | 0.5098      | 0.6895 | 0.7764 | 26.05       | 19.36 | 12.99            |
| Gestures      | MDM      | 0.4098      | 0.5723 | 0.6725 | 21.81       | 25.13 | 10.38            |
|               | MoMask++ | 0.3568      | 0.5125 | 0.6125 | 23.47       | 14.66 | 11.39            |
| Housework     | MDM      | 0.3431      | 0.5093 | 0.6107 | 24.38       | 27.58 | 12.98            |
|               | MoMask++ | 0.3139      | 0.4832 | 0.5900 | 23.40       | 24.69 | 12.96            |
| Outdoors      | MDM      | 0.4262      | 0.6125 | 0.7329 | 26.76       | 28.36 | 12.63            |
|               | MoMask++ | 0.3902      | 0.5689 | 0.6742 | 26.20       | 32.82 | 13.06            |
| Pet Care      | MDM      | 0.3807      | 0.5834 | 0.7004 | 24.72       | 33.23 | 11.56            |
|               | MoMask++ | 0.3018      | 0.4846 | 0.6096 | 24.90       | 30.54 | 12.56            |
| Sport         | MDM      | 0.4891      | 0.6820 | 0.7787 | 28.15       | 20.74 | 13.73            |
|               | MoMask++ | 0.4207      | 0.6158 | 0.7199 | 26.60       | 31.80 | 13.57            |

### 3.1. Dynamic Score Partitions

Starting from the full dataset (A11), we define four subsets by increasing the lower-bound threshold for inclusion:  $V_A$  ( $S_{Dynamic} \geq 0.05$ ),  $V_B$  ( $S_{Dynamic} \geq 0.1$ ),  $V_C$  ( $S_{Dynamic} \geq 0.15$ ), and the highly-dynamic set  $V_D$  ( $S_{Dynamic} \geq 0.5$ ).

### 3.2. Semantic and Physical Insights

Results in Tab. 5 demonstrate that training on subset  $V_C$  yields the optimal semantic trade-off, achieving the best FID (17.97) compared to the full dataset (A11, 20.63). This suggests that aggressively filtering sequences with lower dynamic scores effectively removes static noise that dilutes model performance.

However, training exclusively on the lowest dynamic range tested,  $V_D$ , results in a degraded FID (28.72) and significant physical instability (Jerk 113.35 in Tab. 6). This highlights that training solely on motion below the optimal

dynamic threshold degrades motion smoothness and generation fidelity. It is important to note that while intermediate filtering (e.g.,  $V_C$ ) improves numerical metrics, highly aggressive filtering inevitably discards subtle, fine-grained interactions that are essential for a truly comprehensive and diverse motion distribution.

## 4. Context-Aware Adaptive Filtering

To demonstrate the unique utility of our hierarchical taxonomy, we present an adaptive filtering approach that takes advantage of category-specific semantic context to substantially improve the quality of the dataset while preserving critical motion diversity. We focus on the **foot skating ratio** metric—a measure of foot sliding artifacts common in motion capture data.

Traditional **global filtering** removes all samples with high foot skating values across the entire dataset. For instance, removing the top 15% of foot skating ratio samples

Table 4. **Taxonomy-based physical evaluation.** Fine-grained breakdown of physical motion quality and artifacts comparing MDM and MoMask++ across the top 10 categories.

| Category      | Method   | Foot Skating ↓ | Jerk ↓ | Ground Penetration ↓ | Floating ↑ | Accel. Peaks ↑ | Dynamic Score ↑ |
|---------------|----------|----------------|--------|----------------------|------------|----------------|-----------------|
| Overall       | MDM      | 0.0011         | 46.77  | 0.0e+0               | 0.0146     | 0.8374         | 0.2132          |
|               | MoMask++ | 0.0022         | 332.73 | 2.1e−5               | 0.0020     | 4.7223         | 0.3887          |
| Communication | MDM      | 0.0009         | 32.51  | 0.0e+0               | 0.0217     | 0.4239         | 0.0959          |
|               | MoMask++ | 0.0027         | 217.11 | 1.8e−6               | 0.0043     | 2.5882         | 0.2010          |
| Daily Life    | MDM      | 0.0036         | 49.18  | 0.0e+0               | 0.0054     | 1.0127         | 0.3941          |
|               | MoMask++ | 0.0019         | 320.67 | 5.1e−6               | 0.0010     | 4.6117         | 0.5264          |
| Dance         | MDM      | 0.0004         | 72.88  | 0.0e+0               | 0.0037     | 1.9088         | 0.3031          |
|               | MoMask++ | 0.0005         | 510.93 | 6.4e−6               | 0.0004     | 8.3472         | 0.5850          |
| Education     | MDM      | 0.0001         | 30.52  | 0.0e+0               | 0.0252     | 0.4201         | 0.1055          |
|               | MoMask++ | 0.0009         | 192.41 | 3.7e−7               | 0.0051     | 2.3672         | 0.1986          |
| Fitness       | MDM      | 0.0000         | 60.89  | 0.0e+0               | 0.0073     | 1.1000         | 0.2447          |
|               | MoMask++ | 0.0003         | 432.76 | 1.6e−8               | 0.0008     | 6.1700         | 0.4781          |
| Gestures      | MDM      | 0.0003         | 33.17  | 0.0e+0               | 0.0323     | 0.4644         | 0.1048          |
|               | MoMask++ | 0.0013         | 223.13 | 1.4e−6               | 0.0062     | 2.8128         | 0.2033          |
| Housework     | MDM      | 0.0029         | 40.42  | 0.0e+0               | 0.0121     | 0.7514         | 0.1924          |
|               | MoMask++ | 0.0023         | 345.09 | 1.4e−6               | 0.0013     | 5.6696         | 0.4160          |
| Outdoors      | MDM      | 0.0030         | 51.65  | 0.0e+0               | 0.0089     | 1.1816         | 0.4572          |
|               | MoMask++ | 0.0072         | 341.00 | 1.1e−5               | 0.0016     | 5.0046         | 0.5940          |
| Pet Care      | MDM      | 0.0100         | 51.41  | 1.0e−4               | 0.0188     | 0.8560         | 0.3216          |
|               | MoMask++ | 0.0225         | 306.83 | 9.3e−6               | 0.0027     | 3.9456         | 0.4358          |
| Sport         | MDM      | 0.0006         | 62.34  | 0.0e+0               | 0.0075     | 1.3625         | 0.3428          |
|               | MoMask++ | 0.0008         | 451.61 | 5.5e−6               | 0.0007     | 7.0758         | 0.6317          |

Table 5. **Ablation study on motion dynamics.** Evaluation of MDM performance across different data partitions defined by motion dynamic ( $S_{Dynamic}$ ). The subsets range from high-dynamics ( $V_A$ ) to low-dynamics ( $V_D$ ). Results show that selective training ( $V_C$ ) yields better semantic alignment (FID) than using the complete dataset (All).

| Method | R Precision |        |        | Diversity ↑ | FID ↓ | Matching Score ↑ |
|--------|-------------|--------|--------|-------------|-------|------------------|
|        | Top1        | Top2   | Top3   |             |       |                  |
| All    | 0.5893      | 0.7652 | 0.8441 | 27.67       | 20.63 | 12.06            |
| VA     | 0.5754      | 0.7564 | 0.8473 | 27.66       | 19.61 | 12.18            |
| VB     | 0.5863      | 0.7521 | 0.8414 | 27.82       | 18.70 | 12.24            |
| VC     | 0.5822      | 0.7578 | 0.8434 | 27.59       | 17.97 | 12.18            |
| VD     | 0.4660      | 0.6400 | 0.7441 | 28.79       | 28.72 | 14.26            |

results in 123,178 filtered samples. However, this indiscriminate approach fails to recognize that high foot skating values represent **authentic motion characteristics** in categories such as skateboarding, skiing, and snowboarding, while indicating quality issues in sedentary activities like office work or crafting.

Our adaptive filtering approach addresses this semantic ambiguity through the following steps:

1. **Category Identification:** We identify specific "expected skating" categories where foot skating is natural.
2. **Authenticity Preservation:** We preserve 100% of samples in these natural categories, regardless of their foot skating values.

3. **Contextual Filtering:** We apply **per-subcategory 15% filtering** to all other categories, removing only the worst samples relative to their specific contextual distribution.

This taxonomy-enabled methodology preserves **62,733** high-quality authentic samples that would have been incorrectly removed by global filtering, while simultaneously identifying **45,385** context-specific quality issues that global filtering missed. This result demonstrates how our taxonomy provides the essential semantic structure needed to distinguish between authentic motion and quality artifacts, enabling a robust balance between quality improvement and diversity preservation.

The same adaptive filtering paradigm can be universally

Table 6. **Impact of motion dynamics on physical quality.** Physical metrics for MDM trained on different dynamic score subsets.

| Method | Foot Skating ↓ | Jerk ↓ | Ground Penetration ↓ | Floating ↑ | Acceleration Peaks ↑ | Dynamic Score ↑ |
|--------|----------------|--------|----------------------|------------|----------------------|-----------------|
| All    | 1.70e-03       | 43.98  | 0.00e+00             | 0.0167     | 0.8171               | 0.2138          |
| VA     | 9.61e-04       | 47.69  | 5.99e-06             | 0.0159     | 0.8859               | 0.2311          |
| VB     | 1.57e-03       | 45.13  | 3.09e-05             | 0.0161     | 0.8558               | 0.2120          |
| VC     | 1.10e-03       | 46.77  | 0.00e+00             | 0.0146     | 0.8374               | 0.2132          |
| VD     | 4.23e-04       | 113.35 | 6.94e-04             | 2.85e-03   | 1.37                 | 0.2711          |

applied to other evaluation metrics:

- **Floating (vertical displacement):** Expected in jumping and acrobatic categories but signals errors elsewhere.
- **Ground Penetration:** Natural for digging and excavation activities but represents artifacts in most other contexts.

This flexibility demonstrates how the taxonomy enables researchers to design custom quality control pipelines tailored to downstream tasks. We leave the exploration and evaluation of advanced adaptive filtering strategies within text-to-motion generation for future work.

## 5. Implementation Details

In the main paper we demonstrated the performance of several SOTA architectures (diffusion and GPT) when trained on our dataset. For reproducibility, we provide the implementation details for the different models.

**MDM Training Parameters** We train a Motion Diffusion Model using a transformer-based denoising architecture with 8 layers, 4 attention heads, latent dimension 512, and feedforward dimension 1024. Text conditioning is provided through a frozen BERT encoder with maximum sequence length of 128 tokens. The diffusion process employs 50 denoising steps during training. Motion sequences are processed with a maximum length of 224 frames at 30 FPS, corresponding to approximately 7.5 seconds of motion. We train with batch size 256 for 750,000 iterations using exponential moving average (EMA) of model weights without weight decay regularization.

**MoMask++ Training Parameters** We train MoMask++ on our ITW dataset, with adaptations for our hardware and dataset characteristics. In Stage 1, we train a hierarchical residual VQ-VAE with 6 quantizers across 4 scales (8, 4, 2, 1) using a codebook size of 512 and code dimension of 512. The encoder-decoder architecture uses a width of 512, depth of 3, and temporal downsampling factor of 2. We train for 1000 epochs with batch size 512, learning rate  $3e-4$ , and commitment loss weight 0.02. Critically, we disable gradient clipping to prevent codebook collapse, following recent findings in motion tokenization. In Stage 2, we train a bidirectional masked transformer with 8 layers, 6 attention heads, latent dimension 384, and feedforward dimension 1024. Text conditioning is provided via a frozen T5-base

encoder (768-dim embeddings). We train for 500 epochs with batch size 256, applying linear learning rate scaling to  $8e-4$  ( $4\times$  the base rate of  $2e-4$ ). Both stages use classifier-free guidance with 10% conditioning dropout and a 2000-step warmup schedule with multi-step learning rate decay at milestones [100k, 150k] with gamma 0.3. All experiments are conducted on a single NVIDIA A100-80GB GPU.

## References

- [1] Inwoo Hwang, Jian Wang, Bing Zhou, et al. Snapmogen: Human motion generation from expressive texts. In *The Thirty-ninth Annual Conference on Neural Information Processing Systems*. 1
- [2] Guy Tevet, Sigal Raab, Brian Gordon, Yoni Shafir, Daniel Cohen-or, and Amit Haim Bermano. Human motion diffusion model. In *The Eleventh International Conference on Learning Representations*, 2023. 1
